# Supplementary material for: Governance for safe and responsible AI in healthcare organisations: A scoping review of frameworks
Source: Research Square preprint supplement (doi:10.21203/rs.3.rs-7209096/v1), 2025-08-19
Supplement: Supplementary file 1 [file 50d80f0f0633ba3b70733d0e.xlsx]

## Sheet: Ethics Principles Mapping
Frameworks	Beneficence	Autonomy and human centred-values	Fairness and equity	Privacy and security	Reliability and safety	Transparency	Contestability	Accountability	Non-maleficence	Confidentiality	Consent	Culturally appropriate	Sustainability	Trust & trustworthiness
Abujaber (2024)	x	x	x	x		x			x
ACD (2022)	x	x	x	x		x			x	x
AMA (2023)	x	x	x	x	x	x		x	x	x	x
Apfelbacher et al. (2024)	x	x		x	x	x	x	x
Bellini et al. (2023)	x							x
Bertl et al. (2023)				x
Brady et al. (2024)	x	x	x	x		x			x		x
Callahan et al. (2024)	x	x	x		x	x		x	x
Cartolovni et al. (2022)	x	x	x	x	x	x		x			x			x
Cawthorne & Robbins-van Wynsberghe (2020)	x	x	x	x	x	x		x	x				x	x
Chae (2024)
Char et al. (2020)	x		x			x		x	x		x
CHAI (2024)	x		x	x	x	x	x	x	x	x	x			x
Cresswell et al. (2020)				x	x					x			x
Ding et al. (2024)				x	x				x					x
Dixit et al. (2021)			x	x	x	x	x	x	x	x	x
Economou-Zavlanos et al. (2024)	x		x		x	x		x	x
Hassan et al. (2024)			x	x		x			x				x	x
Hernandez-Boussard et al. (2020)						x								x
Jacob et al. (2025)	x	x	x	x	x	x		x			x		x
Katirai (2023)	x	x	x	x	x	x	x	x	x	x	x		x
Kawamoto et al. (2023)			x			x			x
Khanna et al. (2021)		x	x	x	x	x		x
Kim et al. (2023)			x		x			x						x
Kim et al. (2024)	x	x	x	x	x	x		x					x
Kim et al. (2024)			x		x	x		x
Kwong (2024)						x								x
Lehoux et al. (2023)	x	x	x	x	x	x	x			x			x
Lekadir et al. (2023)	x	x	x	x	x	x		x		x	x		x	x
Liao et al. (2022)	x	x	x		x				x
Liu et al. (2020)						x			x
Marconi et al. (2025)				x		x				x	x
McCradden et al. (2022)		x	x	x		x					x
McCradden et al. (2023)	x		x
Mirbabaie et al. (2022)	x	x	x	x	x	x		x	x		x			x
Morley et al. (2021)					x	x								x
Nasir et al. (2024)	x		x	x	x	x		x	x				x
Nebeker et al (2019)	x	x	x	x	x	x			x	x	x		x
Ning et al. (2024)	x	x	x	x		x		x	x					x
Novak et al. (2023)	x					x			x
Nwosu et al. (2023)			x	x		x
NZ Ministry of Health Manatu Hauora (2019)	x		x	x		x		x	x			x
Omoumi et al. (2021)	x			x	x	x		x	x
Oniani et al. (2023)		x	x	x	x	x		x		x
Raza (2024)
Reddy et al. (2019)		x	x			x		x			x			x
Reddy et al. (2021)				x	x	x			x
Reddy (2024)						x
Roski et al. (2021)				x	x	x		x						x
RANZCR (2023)		x	x	x	x	x		x
Saenz (2024)		x	x	x		x		x		x		x
Salwei et al. (2021)
Segur-Ferrer (2024)	x	x	x	x	x	x		x
Sendak et al. (2020)					x
Siala & Wang (2022)	x	x	x	x	x	x		x	x	x	x		x	x
Singapore MOH, HSA, and IHiS (2021)			x	x	x	x	x	x	x	x	x
Smith et al. (2022)														x
Solanki et al. (2022)	x	x	x	x	x	x	x	x	x	x	x		x	x
Solomonides et al. (2022)	x	x	x		x	x	x	x	x					x
Stogiannos et al. (2023)			x	x	x	x		x		x	x
Taribagil et al. (2023)		x	x	x		x		x	x
Truong et al. (2019)						x							x	x
UK Government Department of Health & Social Care (2021)	x			x	x	x
UK Government National Institute for Health and Care Excellence (2022)	x		x		x	x					x		x
UK NHS (2020)				x										x
UK NHS (2021)	x			x	x			x	x
US Department HHS (2021)	x		x	x	x	x		x			x			x
van de Sande et al. (2022)				x
van der Vegt et al. (2023)			x	x	x	x		x
Vasey et al (2022)			x			x			x
Vollmer et al. (2020)	x		x			x			x
Whittaker et al. (2023)	x	x	x	x	x	x		x	x	x	x	x		x
Wiens et al (2019)						x
WHO (2021)	x	x	x	x	x	x	x	x	x	x	x		x
WHO (2021)	x					x		x	x
WHO (2024)	x	x	x	x	x	x	x	x	x	x	x		x	x
Yan (2025)	x		x
