# Supplementary material for: Governance for safe and responsible AI in healthcare organisations: A scoping review of frameworks
Source: Research Square preprint supplement (doi:10.21203/rs.3.rs-7209096/v1), 2025-08-19
Supplement: Supplementary file 2 [file 8f81989cd14b87172ea3b9fb.xlsx]

## Sheet: Governance Principles Mapping
						Data selection & management				Accuracy & model performance		Monitoring & maintenance					Organisational integration
Framework	Appropriateness & relevance	Usability & adoption	Stakeholder engagement	Awareness, eduation & training	Legal, regulatory, contractual, & human rights compliance	Data selection; data quality & appropriateness	Data governance & storage	Training & validation	Interoperability	Model evaluation & performance	Model accuracy	Continuous monitoring & maintenance	Reporting & risk management	Updating or decommissioning	Technical integration	Workflow/clinical integration	Organisational readiness & alignment	Leadership & management	Financial considerations
Abujaber (2024)			x	x	x							x		x				x
ACD (2022)	x				x	x				x
AMA (2023)	x		x	x	x	x		x		x		x	x			x		x
Apfelbacher et al. (2024)				x	x	x				x		x		x	x	x		x	x
Bellini et al. (2023)	x															x
Bertl et al. (2023)	x	x	x		x	x		x			x
Brady et al. (2024)	x	x		x		x		x		x	x	x		x	x	x			x
Callahan et al. (2024)	x			x				x		x		x	x	x	x	x		x	x
Cartolovni et al. (2022)		x		x				x											x
Cawthorne & Robbins-van Wynsberghe (2020)
Chae (2024)		x	x					x		x					x		x		x
Char et al. (2020)						x		x		x	x	x
CHAI (2024)	x	x	x	x	x	x	x	x	x	x	x	x	x	x	x	x	x	x	x
Cresswell et al. (2020)	x	x	x	x	x	x				x	x	x		x		x	x	x	x
Ding et al. (2024)	x	x							x							x			x
Dixit et al. (2021)	x	x	x			x	x						x	x		x	x	x	x
Economou-Zavlanos et al. (2024)	x	x		x	x	x	x	x		x	x	x		x	x	x		x	x
Hassan et al. (2024)	x	x	x	x	x	x	x			x	x	x			x	x	x	x	x
Hernandez-Boussard et al. (2020)						x		x		x
Jacob et al. (2025)		x		x	x		x		x	x	x	x		x	x	x			x
Katirai (2023)	x			x	x	x				x	x	x		x
Kawamoto et al. (2023)		x	x		x	x				x					x	x
Khanna et al. (2021)			x		x	x					x	x		x				x
Kim et al. (2023)	x			x		x		x		x		x		x	x	x	x
Kim et al. (2024)	x				x	x	x	x		x		x	x	x			x		x
Kim et al. (2024)	x	x	x			x		x		x		x		x		x	x
Kwong (2024)		x		x		x	x			x	x	x		x	x	x
Lehoux et al. (2023)	x		x	x	x	x	x		x						x	x		x	x
Lekadir et al. (2023)	x	x	x	x	x	x	x	x	x	x	x	x	x	x	x	x	x	x	x
Liao et al. (2022)	x				x	x		x		x		x		x		x	x	x	x
Liu et al. (2020)	x					x		x		x	x		x		x	x
Marconi et al. (2025)	x	x	x			x	x	x		x	x								x
McCradden et al. (2022)	x					x	x	x		x						x
McCradden et al. (2023)	x									x		x				x
Mirbabaie et al. (2022)	x			x				x	x
Morley et al. (2021)	x		x			x		x		x	x	x	x	x		x
Nasir et al. (2024)		x	x	x										x				x
Nebeker et al (2019)		x			x	x	x	x	x				x						x
Ning et al. (2024)
Novak et al. (2023)	x			x	x							x				x	x
Nwosu et al. (2023)				x		x						x
NZ Ministry of Health Manatu Hauora (2019)	x		x	x	x	x	x	x		x		x	x				x	x	x
Omoumi et al. (2021)	x	x		x	x	x	x	x	x	x		x	x	x	x	x			x
Oniani et al. (2023)			x		x
Raza (2024)	x	x	x	x				x		x	x				x				x
Reddy et al. (2019)				x		x	x								x	x		x
Reddy et al. (2021)	x	x				x		x		x					x
Reddy (2024)	x	x			x	x	x	x				x	x		x	x		x
Roski et al. (2021)			x			x	x			x		x		x		x	x	x
RANZCR (2023)						x
Saenz (2024)				x	x	x	x	x		x	x	x	x					x
Salwei et al. (2021)	x	x													x	x
Segur-Ferrer (2024)	x	x			x			x	x	x	x	x							x
Sendak et al. (2020)	x	x			x	x		x		x		x			x	x			x
Siala & Wang (2022)	x		x	x		x	x			x	x							x
Singapore MOH, HSA, and IHiS (2021)	x	x	x	x	x	x	x	x		x		x	x	x		x	x	x
Smith et al. (2022)				x													x	x
Solanki et al. (2022)			x	x	x	x		x		x	x	x	x	x
Solomonides et al. (2022)				x								x	x	x
Stogiannos et al. (2023)	x	x	x	x	x	x		x	x	x	x	x	x	x			x	x	x
Taribagil et al. (2023)		x			x	x		x	x	x		x			x	x
Truong et al. (2019)						x		x		x		x					x	x	x
UK Government Department of Health & Social Care (2021)		x			x				x
UK Government National Institute for Health and Care Excellence (2022)	x	x		x		x	x	x		x		x				x		x	x
UK NHS (2020)	x				x					x		x				x	x
UK NHS (2021)		x	x		x		x		x	x				x	x
US Department HHS (2021)	x		x		x	x	x	x	x	x		x	x	x	x				x
van de Sande et al. (2022)			x		x	x	x	x	x	x		x
van der Vegt et al. (2023)		x	x	x	x	x	x	x	x	x	x	x	x	x	x	x	x	x	x
Vasey et al (2022)		x	x	x		x		x		x			x			x
Vollmer et al. (2020)	x		x		x	x	x	x		x		x		x	x				x
Whittaker et al. (2023)	x	x	x	x	x	x	x	x		x	x	x		x	x	x	x	x
Wiens et al (2019)	x		x		x	x		x		x		x	x	x
WHO (2021)	x		x		x	x	x					x	x
WHO (2021)	x	x		x		x	x	x		x	x	x	x	x	x	x			x
WHO (2024)	x		x	x	x	x	x	x		x	x	x	x
Yan (2025)	x		x	x		x		x		x		x			x	x
