# Supplementary material for: Governance for safe and responsible AI in healthcare organisations: A scoping review of frameworks
Source: Research Square preprint supplement (doi:10.21203/rs.3.rs-7209096/v1), 2025-08-19
Supplement: Supplementary file 3 [file a01e07f6e1462e53ca788923.xlsx]

## Sheet: Governance Frameworks Overview
Study	Year	Type	Framework Name	Country/Region	Setting	Focus/Purpose	Source(s)/Methodology	Structure	Key principles covered	Key stages covered	Notes	Link to paper
Abujaber AA, Nashwan AJ. Ethical framework for artificial intelligence in healthcare research: A path to integrity. World J Methodol. 2024;14(3):94071. doi:10.5662/wjm.v14.i3.94071.	2024	Academic literature	Ethical framework for artificial intelligence in healthcare research	Qatar	Health research	Ethical principles	N/A	Theme-based	Ethical principles: - Respect for autonomy, Beneficence, Non-maleficence, Justice Operational guidelines: - Transparency & explainability - Privacy & data protection - Inclusive design & bias mitigation - Stakeholder engagement Implementation principles: - Multidisciplinary collaboration - Education & training - Policy development & regulatory compliance - Ethical review & oversight - Public & st…	N/A		https://pmc.ncbi.nlm.nih.gov/articles/PMC11230076/
The Australasian College of Dermatologists. Position Statement - Use of Artificial Intelligence in Dermatology in Australia. 2022.	2022	Industry	N/A	Australia	Dermatology	Guidelines - to provide a high-level overview of the Australasian College of Dermatologists (ACD) key policy recommendations to guide the development, regulation and adoption of Al in dermatology in Australia	Review - of international dermatology bodies' position papers + regulatory guidelines and ethical position papers. Developed collaboratively by the ACD Digital Health Committee and The University of Queensland.	Theme-based	Key recommendations: - Augmenting care - Ethical use (beneficence, non-maleficence, transparency, reducing bias) - Equity (development of AI that can enhance outcomes for Aboriginal and Torres Strait Islander peoples) - Collaboration - Real-world evaluations - Patient safety (regulatory approval, decision-making by clinician) - Transparency and traceability	N/A		https://www.dermcoll.edu.au/wp-content/uploads/2022/11/ACD-Position-Statement-Use-of-Artifical-Intelligence-in-Dermatology-in-Australia-Nov-2022.pdf
Australian Medical Association. Position Statement - Artificial Intelligence in Healthcare. 2023.	2023	Industry	N/A	Australia	Healthcare - general	Guidelines - this position statement outlines considerations and policy parameters before AI tools are integrated into health service delivery.	N/A	Theme-based	Four themes: - Ethical principles - Development and implementation principles - Regulation - Equity and safety	N/A		https://www.ama.com.au/sites/default/files/2023-08/Artificial%20Intelligence%20in%20Healthcare%20-%20AMA.pdf
Apfelbacher T, Kocman SE, Prokosch HU, Christoph J. A Governance Framework for the Implementation and Operation of AI Applications in a University Hospital. Studies in health technology and informatics. 2024;316:776-80.	2024	Academic literature	N/A	Germany	Healthcare - general	Governance	Review, interviews - literature review and semi-structured interviews with stakeholders from different disciplines at UKER and the University Hospital Halle (Saale). Interviews also involved application scenarios and a role-playing experiment.	N/A	Details/checklist not provided - describes principles in text.	Before implementation During implementation After implementation		https://ebooks.iospress.nl/doi/10.3233/SHTI240527
Bellini V, Cascella M, Montomoli J, Bignami E. From Big Data's 5Vs to clinical practice's 5Ws: enhancing data-driven decision making in healthcare. Journal of clinical monitoring and computing. 2023;37(5):1423-5. doi:https://dx.doi.org/10.1007/s10877-023-01007-3.	2023	Academic literature	The Five Ws	Italy	Perioperative medicine	Implementation	Previous framework(s) - Started from the Five Vs (Volume, Velocity, Veracity, Variety, Value) of Big Data Systems	Theme-based	The 5 Ws: Who? - Who uses the AI tool? Which healthcare professional(s)? What? - What tool among those available? Which interface? Where? - Where is the best setting for this tool? In which patient population? When? - When should this tool be applied? At which stage of the surgical path is it applicable? Why? - Why is this tool relevant and important? Why use it? What are the benefits for the pat…	N/A		https://link.springer.com/article/10.1007/s10877-023-01007-3
Bertl M, Ross P, Draheim D. Systematic AI support for decision-making in the healthcare sector: Obstacles and success factors. Health Policy and Technology. 2023;12(3):100748. doi:https://doi.org/10.1016/j.hlpt.2023.100748.	2023	Academic literature	A framework for improving AI-based DDSS adoption rates	Estonia	Healthcare - general	Implementation - factors influencing AI-based digital decision support systems (DDSS)	Review - Designed based on terminology extracted from two previous systematic literature reviews and own observations. The terminology was extracted from 80 journal articles on DDSSs or AI in psychiatry using thematic analysis and narrative synthesis	Theme-based	7 dimensions: - Medical domain - User group - Technology - Data - Decision - Validation - Maturity	N/A	Within the maturity dimension there are 7 levels/stages of DDSS maturity: 1. Idea without implementation 2. Algorithm development (no real-world interaction) 3. Implementation with real-world interaction but without patient intervention 4. Functioning prototype, system triggers real-world action, e.g. clinical trial 5. Operational product (at least one adopter, certified if required) 6. Locally a…	https://www.sciencedirect.com/science/article/pii/S2211883723000266
Brady AP, Allen B, Chong J, Kotter E, Kottler N, Mongan J, et al. Developing, purchasing, implementing and monitoring AI tools in radiology: Practical considerations. A multi-society statement from the ACR, CAR, ESR, RANZCR & RSNA. J Med Imaging Radiat Oncol. 2024;68(1):7-26. doi:10.1111/1754-9485.13612.	2024	Academic literature	N/A	Multiple countries (US, Canada, Europe, Australia, NZ)	Radiology	Evaluation - considerations for AI developers and purchasers	Self-created - Representatives from multiple radiology societies (ACR, CAR, ESR, RANZCR, RSNA)	Theme-based	Underpinned by medical ethics principles (beneficence, non-maleficence, autonomy, justice). What are the ethical issues? - Privacy, consent and data ownership; Bias and fairness; Transparency and explainability; AI in clinical practice What should developers consider when creating a new AI tool for radiology? A. Clinical utility of new products B. Superiority to existing clinical/radiology tools …	N/A	https://insightsimaging.springeropen.com/articles/10.1186/s13244-023-01541-3	https://insightsimaging.springeropen.com/articles/10.1186/s13244-023-01541-3/tables/4
Callahan A, McElfresh D, Banda JM, Bunney G, Char D, Chen J, et al. Standing on FURM ground--A framework for evaluating Fair, Useful, and Reliable AI Models in healthcare systems. arXiv preprint arXiv:240307911. 2024.	2024	Academic literature	FURM (Fair, Useful, and Reliable AI Models) Assessment	US	Healthcare - general (Stanford Health Care)	Evaluation - testing and evaluation framework for AI models in healthcare systems	Self-created - developed by the Data Science team at Stanford Health Care	Theme x stage	Stage 1: - Problem, need and use case definition - Usefulness estimates by workflow simulation - Financial projections - Ethical considerations (Responsibility, Equity, Traceability, Reliability, Governance, Non-maleficence, Autonomy) Stage 2: - Model formulation - Model training and testing - Deployment on SHC infrastructure - Organisational integration Stage 3: - Monitoring - Prospective evalua…	3 stages: 1. What & Why 2. How 3. Impact		https://arxiv.org/pdf/2403.07911
Čartolovni A, Tomičić A, Lazić Mosler E. Ethical, legal, and social considerations of AI-based medical decision-support tools: A scoping review. International Journal of Medical Informatics. 2022;161:104738. doi:https://doi.org/10.1016/j.ijmedinf.2022.104738.	2022	Academic literature	ELSI of AI-based Medical Decision Support Tools	Croatia	Healthcare - general	Ethical principles - present ELSI; guide various stakeholders (e.g. designers, engineers, clinicians) in addressing the ELSI of AI at the design stage using the Ethics by Design (EbD) approach.	Review - Scoping review	Theme-based	ELSI organised into four clusters: - AI algorithms - Physicians - Patients - Healthcare Safety & transparency are the two most pressing issues that overlap for all clusters	N/A		https://www.sciencedirect.com/science/article/pii/S1386505622000521
Cawthorne D, Robbins-van Wynsberghe A. An Ethical Framework for the Design, Development, Implementation, and Assessment of Drones Used in Public Healthcare. Science and engineering ethics. 2020;26(5):2867-91. doi:https://dx.doi.org/10.1007/s11948-020-00233-1.	2020	Academic literature	Values hierarchy for drones in public healthcare	Europe	Public health - use of drones	Ethical principles - ethical framework for drones in public healthcare	Previous framework(s) - Based on the theory of Value Sensitive Design (VSD). Bioethics principles as starting point plus explicability (from other AI ethics frameworks)	Theme-based	Ethical principles (bioethics) with associated human values: 1. Beneficence - human welfare, jobs/human skills, environmental sustainability 2. Non-maleficence - privacy, safety, security, jobs/human skills, calmness, environmental sustainbaility 3. Autonomy - agency, responsibility, trust 4. Justice - fairness 5. Explicability - intelligibility, accountability	N/A		https://link.springer.com/article/10.1007/s11948-020-00233-1
Chae A, Yao MS, Sagreiya H, Goldberg AD, Chatterjee N, MacLean MT, et al. Strategies for Implementing Machine Learning Algorithms in the Clinical Practice of Radiology. Radiology. 2024;310(1).	2024	Academic literature	A Proposed Framework for Clinical AI Implementation	US	Radiology	Implementation - clinical AI implementation in an academic research hospital environment	Review - a review of recent literature and empirical evidence in radiologic imaging applications	Stage-based	N/A	1. Problem identification 2. Stakeholder alignment 3. Pipeline integration		https://pubs.rsna.org/doi/10.1148/radiol.223170
Char DS, Abramoff MD, Feudtner C. Identifying Ethical Considerations for Machine Learning Healthcare Applications. The American journal of bioethics : AJOB. 2020;20(11):7-17. doi:https://dx.doi.org/10.1080/15265161.2020.1819469.	2020	Academic literature	Pipeline model for identifying ethical considerations for ML-HCAs	US	Healthcare - general	Ethical principles - systematic ethical appraisals of ML-HCA from development through implementation	Review - Mostly identified from a literature review + identifying gaps in ethical considerations	Theme x stage	Subthemes (and associated ethical considerations) under each phase: 1. Conception - Auditability, Transparency Standards, Conflicts of Interest 2. Development - Perpetuation of Bias within Training Data, Risk of Harm Due to Group Membership, Obtaining Training Data (Social Justice) 3. Calibration - Accuracy, Trading off Test Characteristics, and Calibrated Risk of Harm (Benefit Seeking, Harm Mini…	4 phases along the developmental pipeline: 1. Conception 2. Development 3. Calibration 4. Implementation, evaluation, and oversight		https://www.ncbi.nlm.nih.gov/pmc/articles/PMC7737650/
Coalition for Health AI (CHAI). Assurance Standards Guide and Reporting Checklist 2024 [Available from: https://chai.org/assurance-standards-guide/.	2024	Industry	CHAI Assurance Standards Guide and Assurance Reporting Checklist (ARC)	US	Healthcare - general	Standards for development and implementation	Self-created -This guide was created by patient advocates, technology developers, clinicians, and data scientists, who worked together to create a common framework for AI standards in healthcare, based on real-world practices.	Theme x stage	5 core principles for trustworthy health AI: 1. Usefulness, usability, and efficacy 2. Fairness and equity 3. Safety and reliability 4. Transparency , intelligibility, and accountability 5. Security and privacy	6 stages Stage 1: Define the problem Stage 2: Design the AI system Stage 3: Engineer the AI solution Stage 4: Assess Stage 5: Pilot Stage 6: Deploy & monitor		Assurance Standards Guide - CHAI - Coalition for Health AI
Cresswell K, Williams R, Sheikh A. Developing and applying a formative evaluation framework for health information technology implementations: Qualitative investigation. Journal of Medical Internet Research. 2020;22(6):15068. doi:https://dx.doi.org/10.2196/15068.	2020	Academic literature	The Technology, People, Organizations, and Macroenvironmental factors (TPOM) framework	UK	Healthcare - general	Evaluation - formative evaluation of health information technology (HIT) implementations	Review, case studies 1. Review of existing frameworks and systematic literature review to explore which factors are important for the effective implementation of HIT. 2. A series of case studies of different HIT implementations in the UK (e.g. EHRs, CDS systems, etc.) 2009-2018 - semi-structured stakeholder interviews, observations, documents (e.g. meeting minutes, business cases).	Theme-based	4 factors (and their interrelations) Technological factors: Usability; Performance; Adaptability and flexibility; Dependability; Data availability, integrity, and confidentiality; Data accuracy; Sustainability; Security Social/human factors: User satisfaction; Complete/correct use; Attitudes and expectations; Engagement; Experiences; Workload/benefits; Work processes; User input in design Organis…	N/A		https://www.jmir.org/2020/6/e15068/
Ding H, Simmich J, Vaezipour A, Andrews N, Russell T. Evaluation framework for conversational agents with artificial intelligence in health interventions: a systematic scoping review. Journal of the American Medical Informatics Association. 2023;31(3):746-61. doi:10.1093/jamia/ocad222.	2024	Academic literature	CA evaluation framework	Australia	Healthcare - general; conversational agents	Evaluation - evaluation framework for CA interventions	Review - Systematic scoping review. Stages and corresponding evaluation targets from WHO's recommendations for digital health interventions	Theme x stage	Domains: - User characteristics for implementation science - Usage, adherence and uptake - Cost and health economic analyses - Clinical/health outcomes - User experience - Safety and information quality - Funcitonality	Four stages: 1. Feasibility and usability 2. Efficacy 3. Effectiveness 4. Implementation		https://academic.oup.com/jamia/article/31/3/746/7467291
Dixit A, Quaglietta J, Gaulton C. Preparing for the future: How organizations can prepare boards, leaders, and risk managers for artificial intelligence. Healthcare management forum. 2021;34(6):346-52. doi:https://dx.doi.org/10.1177/08404704211037995.	2021	Academic literature	Risk management guiding principles	Canada	Healthcare - general	Governance - organisational level - risk management of AI - things to consider when establishing policies and procedures for AI risk management in healthcare organisations	Self-created - The research team developed this list by using the Osborn method to identify as many recommended actions as possible. This method involves identifying as many possible answers to a question of interest. The list is then validated against any known standards or guidance documents and refined to remove any redundant items. The team consulted existing risk management guidance document…	Theme-based	5 guiding principles: - Ethical risks: Clearly define the value proposition of AI systems - Governance risks: Establish comprehensive governance and oversight - Performance risks: Apply rigorous methods in building AI systems - Implementation risks: Apply change management tools and processes - Security risks: Create strict privacy and security protocols Includes questions for three different sta…	N/A		https://journals.sagepub.com/doi/full/10.1177/08404704211037995
Economou-Zavlanos NJ, Bessias S, Cary MP, Bedoya AD, Goldstein BA, Jelovsek JE, et al. Translating ethical and quality principles for the effective, safe and fair development, deployment and use of artificial intelligence technologies in healthcare. Journal of the American Medical Informatics Association. 2024;31(3):705-13. doi:https://dx.doi.org/10.1093/jamia/ocad221.	2024	Academic literature	The ABCDS governance framework (and associated implementation guide with evaluation criteria and checklist of submission materials)	US	Healthcare - general (Duke Health)	Governance - translation of ethical and quality principles for evaluation and governance of algorithmic technologies at Duke Health	Previous framework(s) Framework: based on international standard and FDA guidelines for development of software/medical devices. Implementation guide: initial evaluation criteria were based on TRIPOD reporting standards, FDA guidance, model fact sheets. Guide is iteratively refined based on federal/local policies and learnings from QI efforts and development team feedback.	Theme x stage	5 key domains: - Clinical Value and Safety - Fairness & Equity - Usability & Adoption - Regulatory Compliance - Transparency and Accountability	1. Model development 2. Silent evaluation 3. Effectiveness evaluation 4. General deployment	Related paper: https://doi.org/10.1093/jamia/ocac078 (Bedoya et al. 2022)	https://academic.oup.com/jamia/article/31/3/705/7455696?login=true
Hassan M, Borycki EM, Kushniruk AW. Artificial intelligence governance framework for healthcare. Healthcare Management Forum. doi:10.1177/08404704241291226.	2024	Academic literature	AI governance framework	Canada	Healthcare - general	Governance	Review, self-created - review analysing barriers and facilitators of AI in healthcare; developed by authors	Theme x stage	Focus on trust and adoption - Bias/equity/fairness - Transparency & explainability - Risk (of harm) - Data handling & processing - Algorithm output (accuracy/usefulness) - Workflow integration - Usability - Education/awareness Strategic alignment Proble-driven use case Funding assessment Infrastructure fit/resource	1. Ideation 2. Algorithm development & implementation 3. Sustainability		https://journals.sagepub.com/doi/full/10.1177/08404704241291226
Hernandez-Boussard T, Bozkurt S, Ioannidis JPA, Shah NH. MINIMAR (MINimum Information for Medical AI Reporting): Developing reporting standards for artificial intelligence in health care. Journal of the American Medical Informatics Association : JAMIA. 2020;27(12):2011-5. doi:https://dx.doi.org/10.1093/jamia/ocaa088.	2020	Academic literature	MINIMAR	US	Healthcare - general	Reporting - reporting standards for AI in healthcare	Self-created - developed by the authors	Theme-based	4 essential components: 1. Study population and setting - population, study setting, data source, cohort selection 2. Patient demographic characteristics - age, sex, race, ethnicity, SES 3. Model architecture - model output, target user, data splitting, gold standard, model task, model architecture, features, missingness 4. Model evaluation - optimisation, internal model evaluation, external mode…	N/A		https://www.ncbi.nlm.nih.gov/pmc/articles/PMC7727333/
Jacob C, Brasier N, Laurenzi E, Heuss S, Mougiakakou SG, Coltekin A, et al. AI for IMPACTS Framework for Evaluating the Long-Term Real-World Impacts of AI-Powered Clinician Tools: Systematic Review and Narrative Synthesis. Journal of Medical Internet Research.27:e67485. doi:https://dx.doi.org/10.2196/67485.	2025	Academic literature	AI for IMPACTS	Switzerland	Healthcare - general	Evaluation - evaluating long-term impacts of AI tools	Review - systematic review of existing evaluation criteria to assess the impact of AI in health care	Theme-based	IMPACTS: Integration, interoperability, and workflow: how seamlessly does the AI tool integrate into clinical workflows and healthcare systems? - Infrastructure, Interoperability, Worklow and organisational changes Monitoring, governance, and accountability: how is the tool monitored, addressing model drift, data governance, and compliance with ethical standard? - Accountability and liability, Co…	N/A		https://www.jmir.org/2025/1/e67485
Katirai A. The ethics of advancing artificial intelligence in healthcare: analyzing ethical considerations for Japan's innovative AI hospital system. Frontiers in public health. 2023;11(101616579):1142062. doi:https://dx.doi.org/10.3389/fpubh.2023.1142062.	2023	Academic literature	Coding framework created from the WHO Guidance	Japan	Healthcare - general; Government Plan regarding AI in healthcare	Ethical principles - a coding framework to assess the extent of ethical consideration in Japan's Cross-Ministerial Strategic Innovation Promotion Program, which includes a five-part plan for AI in healthcare	Previous framework(s) - WHO Guidance on the Ethics and Governance of Artificial Intelligence for Health (2021)	Theme-based	6 ethical principles: 1. Protecting human autonomy 2. Promoting human well-being and safety and the public interest 4. Fostering responsibility and accountability 5. Ensuring inclusiveness and equity 6. Promoting AI that is responsive and sustainable	N/A		https://www.frontiersin.org/journals/public-health/articles/10.3389/fpubh.2023.1142062/full
Kawamoto K, Finkelstein J, Del Fiol G. Implementing Machine Learning in the Electronic Health Record: Checklist of Essential Considerations. Mayo Clinic Proceedings. 2023;98(3):366-9. doi:https://dx.doi.org/10.1016/j.mayocp.2023.01.013.	2023	Academic literature	Checklist for Implementing Machine Learning in the Electronic Health Record	US	Healthcare - general; EHRs	Implementation - ML in the EHR	Review, self-created - Based on literature and own experiences	Theme-based	7 essential considerations: - Develop fit-for-purpose ML models with the targeted EHR workflow defined a priori - Understand the tehcnical constraints of the EHR deployment environment - Consider governance and regulatory requirements - Consider the long-term deployment scope - Acknowledge and address the difficulty of changing clinician behaviour - Evaluate ML models and their impact, including …	N/A		https://www.sciencedirect.com/science/article/pii/S0025619623000204?via%3Dihub
Khanna S, Khanna I, Srivastava S, Pandey V. AI Governance Framework for Oncology: Ethical, Legal, and Practical Considerations. Quarterly Journal of Computational Technologies for Healthcare. 2021;6(8):1-26.	2021	Academic literature	Proposed AI Governance Framework in Oncology	India	Oncology	Governance (specifically for oncology)	Review - A systematic analysis of existing AI governance frameworks and their applicability to oncology, including identification of key elements from ethics and human rights guidelines.	Theme-based	7 domains: - Ethical and Human Rights Compliance - Technological Robustness and Safety - Transparency and Accountability - Equity and Non-Discrimination - Innovation and Adaptive Governance - Stakeholder Engagement and Patient-Centred Care - Legal and Regulatory Compliance	N/A		https://vectoral.org/index.php/QJCTH/article/view/76
Kim JY, Boag W, Gulamali F, Hasan A, Hogg HDJ, Lifson M, et al., editors. Organizational governance of emerging technologies: AI adoption in healthcare. Proceedings of the 2023 ACM Conference on Fairness, Accountability, and Transparency; 2023; Chicago, IL, USA: Association for Computing Machinery.	2023	Academic literature	Key decision points represented as thematic areas and corresponding subthemes.	US	Healthcare - general	Governance - factors shaping decisions related to adopting AI at the organisational level	Interviews - In-depth interviews with 89 participants (clinical, technical, operational, regulatory personnel).	Theme x stage	1: Problem identification, Problem prioritization, AI contribution 2: Requirement and feasibility, Quality assurance, Build vs. buy decision, Aligning affected parties 3: Model performance measures, Success measures 4: Operational optimization, Technical optimization 5: Data quality assurance, Validation, Risk mitigation, Clinically integrate vs. abandon decision 6: Communication, Education and t…	8 key decision points: 1. Identify and prioritise a problem 2. Identify requirements for an AI product as a viable component of the solution 3. Develop measures of outcomes and success of the AI product 4. Design a new optimal workflow to facilitate integration 5. Evaluate safety, effectiveness, and equity concerns of the AI product in the intended setting prior to clinical use 6. Execute AI prod…		https://arxiv.org/abs/2304.13081
Kim J, Kim SY, Kim E-A, Sim J-A, Lee Y, Kim H. Developing a Framework for Self-regulatory Governance in Healthcare AI Research: Insights from South Korea. Asian Bioethics Review. 2024:1-16. doi:https://doi.org/10.1007/s41649-024-00281-w.	2024	Academic literature	Procedural Considerations for Conducting Healthcare AI Research	South Korea	Health research	Governance - governance framework for healthcare AI research in Korea	Review, consultation Governance framework is from the Korean National Institutes of Health's 'Research Ethics Guidelines for AI Researchers in Healthcare' (August 2023). The framework was developed based on literature reviews, interdisciplinary consultations, a public hearing, empirical research evidence from surveys for the lay public and experts.	Stage-based	Grounded in 6 ethical principles (aligned with WHO principles) - Respect and protect human autonomy - Promoting human happiness, safety, and the public interest - Transparency, explainability, and reliability - Accountability and legal obligations - Inclusivity and equity - Responsiveness and sustainability	6 stages: 1. Preliminary ethics review 2. Creating datasets 3. Model development 4. Training, validation, and evaluation 5. Application 6. Post-deployment Monitoring		https://link.springer.com/article/10.1007/s41649-024-00281-w
Kim JY, Hasan A, Kellogg KC, Ratliff W, Murray SG, Suresh H, et al. Development and preliminary testing of Health Equity Across the AI Lifecycle (HEAAL): A framework for healthcare delivery organizations to mitigate the risk of AI solutions worsening health inequities. PLOS Digit Health. 2024;3(5):e0000390. doi:10.1371/journal.pdig.0000390.	2024	Academic literature	HEAAL Framework	US	Healthcare - general	Evaluation - impact of potential implementation on health equity	Workshop/focus group - Case-based co-design workshop with 77 clinical, tehcnical, oeprational, and regulatory leaders from healthcare delivery organisations and ecosystem partners in the US. Feedback and evaluation on prototypes by Health AI Partnership leaders.	Stage-based	Domains of assessment: - Accountability - Fairness - Fitness for purpose - Reliability and validity - Transparency	Problem identification and management 1. Identify and prioritise a problem 2. Define AI product scope and intended use Development and adaptation 3. Develop success measures 4. Design AI solution workflow 5. Generate evidence of safety, efficacy, and equity Clinical integration 6. Execute AI solution rollout Lifecycle management 7. Monitor the AI solution 8. Update or decommission the AI solution		https://pmc.ncbi.nlm.nih.gov/articles/PMC11081364/
Kwong JCC, Nickel GC, Wang SCY, Kvedar JC. Integrating artificial intelligence into healthcare systems: more than just the algorithm. npj Digital Medicine. 2024;7(1). doi:10.1038/s41746-024-01066-z.	2024	Academic literature	Considerations for implementing AI algorithms into healthcare systems	Canada	Healthcare - general	Implementation	Self-created, case study - developed in relation to the evaluation of COMPOSER (Boussina et al.)	Theme-based	Themes: - Data - Infrastructure - Interface - End-users - Clinical context - Monitoring	N/A		https://www.nature.com/articles/s41746-024-01066-z
Lehoux P, Rocha de Oliveira R, Rivard L, Silva HP, Alami H, Mörch CM, et al. A Comprehensive, Valid, and Reliable Tool to Assess the Degree of Responsibility of Digital Health Solutions That Operate With or Without Artificial Intelligence: 3-Phase Mixed Methods Study. J Med Internet Res. 2023;25:e48496. doi:10.2196/48496.	2023	Academic literature	Responsible DAI solutions Assessment Tool	Canada	Healthcare - general	Evaluation - assess the degree of responsibility of digital solutions in health and social care that operate with or without AI (for both designers and implementers).	Review, expert consensus 3-phase mixed methods study - Phase 1 - Concept mapping: scoping review of practice-oriented tools guide responsible development and use of DAI - Phase 2 - Content validity assessment: international 2-round modifice e-Delphi exercise with 4 groups of experts - Phase 3 - Reliability assessment: interrater agreement study where 2 raters inedpendently apply the tool to 25 DA…	Theme-based	4 premises: - The context of use largely shapes responsibility - Responsible DAI solutions aim for collective health - DAI solutions should tangibly improve current processes and means - DAI solutions affect determinants of health 5 assessment criteria domains: - Population health value - Health system value - Economic value - Organisational value - Environmental value	N/A	Scoring method included Concept of degree of responsibility is based on research on 'Responsible Innovation in Health' (RIH), which involves commitment to a set of ethical, economic, social, and environmental principles, values, and requirements	https://www.ncbi.nlm.nih.gov/pmc/articles/PMC10495857/
Lekadir K, Feragen A, Fofanah AJ, Frangi AF, Buyx A, Emelie A, et al. FUTURE-AI: International consensus guideline for trustworthy and deployable artificial intelligence in healthcare. ArXiv. 2023;abs/2309.12325.	2023	Academic literature	FUTURE-AI	Europe/international	Healthcare - general	Implementation	Review, expert consensus - Framework was established through international consensus over a 24-month period using a modified Delphi approach. Initially: similar approach to the FAIR guideline; used a literature review to identify six guiding principles.	Theme x stage	Fair 1 Define any potential sources of bias from an early stage; 2 Collect data on individuals’ attributes, when possible; 3 Evaluate potential biases and bias correction measures Universal 1 Define intended clinical settings and cross-setting variations; 2 Use community-defined standards (e.g. clinical definitions, technical standards); 3 Evaluate using external datasets and/or multiple sites; 4…	1. Design stage 2. Development stage 3. Evaluation stage 4. Deployment stage		https://arxiv.org/pdf/2309.12325
Liao F, Adelaine S, Afshar M, Patterson BW. Governance of Clinical AI applications to facilitate safe and equitable deployment in a large health system: Key elements and early successes. Frontiers in Digital Health. 2022;4:931439.	2022	Academic literature	N/A	US	Healthcare - general (University of Wisconsin Health)	Governance - organisational level	Previous framework(s) -Structure and process was developed over time, operationalising existing(?) models and iteratively repsonding to challenges through ad hoc formation of workgroups	Theme-based	Set of guiding principles endorsed by the AI Committee: 1. Predictive model 2. Model evaluation includes statistical measures and relevant operational health metrics 3. Model output follows the five rights of CDSs and is associated with interventions 4. Model monitoring 5. Healthcare ethics incorporated in all stages of model evaluation and validation	Value stream from initial presentation to the Committee to periodic review and update or decomissioning		https://pmc.ncbi.nlm.nih.gov/articles/PMC9448877/
Liu X, Cruz Rivera S, Moher D, Calvert MJ, Denniston AK, Ashrafian H, et al. Reporting guidelines for clinical trial reports for interventions involving artificial intelligence: the CONSORT-AI extension. The Lancet Digital health. 2020;2(10):e537-e48. doi:10.1016/S2589-7500(20)30218-1.	2020	Academic literature	CONSORT-AI	UK	Health research - clinical trials	Reporting - reporting standards for AI in clinical trials	Review, consultation, expert consensus - Initial candidate items generated through literature review and consultation with Steering Group and known international experts. Final extension reccommendations by Delphi consensus process followed by a checklist pilot	Based on structure of a report	New items for AI extension Title and abstract: - Indicate that the intervention involves artificial intelligence/machine learning in the title and/or abstract and specify the type of model. - State the intended use of the AI intervention within the trial in the title and/or abstract. Introduction: - Explain the intended use of the AI intervention in the context of the clinical pathway, including …	N/A		https://www.bmj.com/content/370/bmj.m3164.long
Marconi L, Pirovano E, Cabitza F. CLARITY AI: A Comprehensive Checklist Integrating Established Frameworks for Enhanced Research Quality in Medical AI Studies.2025.	2025	Academic literature	CLARITY AI	Italy	Health research - checklist for research quality in medical AI studies	Evaluation - evaluation of quality of medical AI research studies	Previous framework(s) - CLAIM AI, CONSORT AI, DECIDE AI, FUTURE AI (ethical principles), IJMEDI AI, PRISMA AI, SPIRIT AI, STARD AI, STARE HI, TRIPOD AI)	Based on the structure of a report	Structural Items - report structure (title, abstract, introduction, methods, results, discussion, conclusions, other elements) Macro Topic Items - Study identification - Structured summary - Background & objectives - Study design & methods - Data handling - Model details - Performance metrics - Results & findings - Discussion & implications - Ethics & governance - Human factors & usability - Tran…	N/A	Scoring method included	https://ceur-ws.org/Vol-3880/paper1.pdf
McCradden MD, Anderson JA, E AS, Drysdale E, Erdman L, Goldenberg A, et al. A Research Ethics Framework for the Clinical Translation of Healthcare Machine Learning. Am J Bioeth. 2022;22(5):8-22. doi:10.1080/15265161.2021.2013977.	2022	Academic literature	A Research Ethics Framework Enabling Clincal Translation of ML	Canada	Health research - research ethics for ML research	Translation and integration - ML in healthcare; research ethics	N/A	Theme x stage	Scientific objectives (and methods) at each phase. Phase 1 - hypothesis generation: model development Phase 2 - hypothesis testing: is the model ecologically valid? Can it be feasibly implemented into clinical workflow? Phase 3 - Hypothesis testing: does this model improve outcomes? For whom? Under what conditions? Application of core ethical principles from The Belmont Report (Respect for Person…	3 phases: 1. Data access protocols 2. Silent evaluation 3. Prospective clinical evaluation 3 stages (not necessarily sequential - may be iterative and overlapping) 1. Exploratory ML research 2. Silent period evaluation 3. Prospective clinical evaluation	Supports the authors' previous translation pipeline which describes a process for research ethics oversight of clinical AI: https://www.nature.com/articles/s41591-020-1035-9	https://www.tandfonline.com/doi/full/10.1080/15265161.2021.2013977
McCradden MD, Joshi S, Anderson JA, London AJ. A normative framework for artificial intelligence as a sociotechnical system in healthcare. Patterns (N Y). 2023;4(11):100864. doi:10.1016/j.patter.2023.100864.	2023	Academic literature	Intervention Ensemble for Clinical Machine Learning Systems	Canada	Healthcare - general	Translation and integration - ML products Advocating for a conceptual shift towards viewing AI tools as sociotechnical systems - a one part of a greater system (of people, processes, and environment) that surrounds its use to achieve benefit	Review, self-created - Narrative search of existing regulatory frameworks and reporting guidelines, authors' own experiences translating models at the point of care	Theme-based	Clinical or social value: - The use case ML tool system failures: - The Task and Outcome - Performance Threshold Setting - Performance Across Subgroups User Knowledge: - Use Parameters and Limitations Standardised Practices to Ensure Safe and Effective Use: - Monitoring	N/A		https://www.sciencedirect.com/science/article/pii/S2666389923002489
Mirbabaie M, Hofeditz L, Frick NRJ, Stieglitz S. Artificial intelligence in hospitals: providing a status quo of ethical considerations in academia to guide future research. AI Soc. 2022;37(4):1361-82. doi:10.1007/s00146-021-01239-4.	2022	Academic literature	Actionable ethics principles	Germany	Healthcare - general (hospitals)	Ethical principles - to guide future research	Review, interviews - Systematic discourse approach highlighted by expert interviews with healthcare specialists. Found 15 fundamental manuscripts by constructing a citation network for the ethical discourse, and extracted actionable principles and their relationships	Theme-based	EXTRACTED FROM 15 MANUSCRIPTS: Regulatory Issues - Accountability, Responsibility, (Legal) liability, Privacy Normative Issues - Avoiding bias and harms, Patient safety, Fairness, Informed consent Technical Issues - Interoperability and generalizability, Iterative controllability and updatability, Vigilance FORMAL GROUPING: Beneficence - Vigilance, Security, Privacy, Avoid bias and harms Non-male…	N/A		https://pmc.ncbi.nlm.nih.gov/articles/PMC8238382/
Morley J, Morton C, Karpathakis K, Taddeo M, Floridi L. Towards a framework for evaluating the safety, acceptability and efficacy of AI systems for health: an initial synthesis. arXiv preprint arXiv:210406910. 2021.	2021	Academic literature	Framework for evaluating the safety, acceptability and efficacy of AI systems for health	UK	Healthcare - general	Evaluation - safety, acceptability, and efficacy of AI in health	Review - Thematic synthesis to identify key concepts involved in the evaluation of AI systems	Stage-based	Key questions at each stage: 1. Is this AI system the right solution to the problem? 2. Has the AI system been designed in the right way? 3. Is the AI system working in the right way? 4. Is the AI system having the right kind of impact?	4 stages: 1. Preclinical stage (Theoretical Stage) 2. Exploratory stage (Validation Stage) 3. Definitive Stage (Real-world Evaluation Stage) 4. Post-market surveillance		https://arxiv.org/pdf/2104.06910
Nasir S, Khan RA, Bai S. Ethical Framework for Harnessing the Power of AI in Healthcare and Beyond. IEEE Access. 2024;12:31014-35. doi:10.1109/ACCESS.2024.3369912.	2024	Academic literature	Safe AI ethical framework Secondary framework: Governance and collaboration ecosystem	Pakistan	Healthcare - general; Sector-agnostic (but with a focus on healthcare)	Ethical principles - presentation of a novel ethical framework to regulate AI Secondary framework - organisational governance	Review - Narrative review identifying and discussing limitations of AI systems; analysis of GDPR (EU) and HIPAA (US) - articles in the laws relevant to data protection	Theme-based	6 pillars: - Sensitivity - Evaluation - User-centricity - Responsibility - Beneficence - Security Secondary framework Key domains: - Human Oversight and Intervention - Muti-Stakeholder Engagement - Privacy by Design - Safe AI - Ethical Governance Council - Awareness programs (Training & Education) - Continuous Improvement & Adaptability - Inter-generational Considerations	N/A		https://arxiv.org/abs/2309.00064
Nebeker C, Torous J, Bartlett Ellis RJ. Building the case for actionable ethics in digital health research supported by artificial intelligence. BMC Medicine. 2019;17(1):137. doi:10.1186/s12916-019-1377-7.	2019	Academic literature	The Digital Health Framework (and associated Digital Health Checklist)	US	Health research - digitial health technologies	Evaluation - digital health technologies - while originally developed for researchers, this framework is applicable to various stakeholders who might evaluate and select digital technologies for use in health research and healthcare	Workshop/focus group - The checklist was informed via developmental research involving a focus group discussion, and a design exercise with behavioral scientists	Theme-based	4 key domains with 3 overarching ethical principles: - Ethical principles: Respect for Persons, Beneficence, Justice - Privacy - Access & Usability - Data Management - Risks and Benefits	N/A		https://bmcmedicine.biomedcentral.com/articles/10.1186/s12916-019-1377-7
New Zealand Ministry of Health. Emerging Health Technology: Introductory Guidance. 2019.	2019	Government document	The Introductory Guidelines for safely developing and using Algorithms in Healthcare	New Zealand	Healthcare - general (NZ)	Governance	Workshop/focus group - Ministry of Health workshop in late August 2018 with government agencies, public sector, health professionals as well as industry and regulatory experts. Presentations were given by attendees on ethics, research, industry and sector view, followed by a round-table strategy session with participants focusing on the four topics of Governance, Bias, Operationalising and Assura…	Theme-based	Governance - How do you ensure that algorithms are well governed? - Are there reporting tools to understand all the previous elements? Managing Bias - Why is this needed? - Tools or processes to be used in assessing bias. Operationalising Algorithms - What roadblocks need to be considered? Principles or approaches for addressing these. Assurance/Confidence - How do you know that this is a good al…	N/A		https://www.tewhatuora.govt.nz/assets/Uploads/introductory_guidance_-_algorithms_v0.4_-_web.pdf
Ning Y, Teixayavong S, Shang Y, Savulescu J, Nagaraj V, Miao D, et al. Generative artificial intelligence and ethical considerations in health care: a scoping review and ethics checklist. The Lancet Digital Health. 2024;6(11):e848-e56.	2024	Academic literature	Transparent Reporting of Ethics for Generative AI (TREGAI) Checklist	Singapore	Health research - genAI research ethics	Ethical principles - checklist of ethical concerns	Review - scoping review of ethical issues in genAI	Theme-based	Ethical principles: - Accountability - Autonomy - Beneficence - Equity - Integrity - Non-maleficence - Privacy - Security - Transparency - Trust - Other	N/A		https://www.sciencedirect.com/science/article/pii/S2589750024001432?via%3Dihub
Novak LL, Russell RG, Garvey K, Patel M, Thomas Craig KJ, Snowdon J, et al. Clinical use of artificial intelligence requires AI-capable organizations. JAMIA Open. 2023;6(2):ooad028. doi:10.1093/jamiaopen/ooad028.	2023	Academic literature	Organisational Capabilities for AI in healthcare	US	Healthcare - general	Governance - organisational level	N/A	Theme-based	Infrastructures (Addressing structural inequities in healthcare data, regulatory frameworks) ---> Organisational Capabilities: - Resources (AI software documentation, health ecosystem impact statements) - Routines - Competencies ---> Successful performance of capabilities Interorganisational collaboration	N/A		https://academic.oup.com/jamiaopen/article/6/2/ooad028/7150783
Nwosu OI, Crowson MG, Rameau A. Artificial Intelligence Governance and Otolaryngology-Head and Neck Surgery. Laryngoscope. 2023;133(11):2868-70. doi:10.1002/lary.31013.	2023	Academic literature	Central Tenets of AI Governance	US	OHNS	Ethical principles - central tenets regarding ethics and regulation for AI governance	N/A	Theme-based	5 main tenets of AI governance: - Fairness - Transparency - Interpretability - Privacy and Security - Lifecycle Oversight	N/A		https://onlinelibrary.wiley.com/doi/10.1002/lary.31013
Omoumi P, Ducarouge A, Tournier A, Harvey H, Kahn CE, Louvet-de Verchère F, et al. To buy or not to buy—evaluating commercial AI solutions in radiology (the ECLAIR guidelines). European radiology. 2021;31(6):3786-96. doi:10.1007/s00330-020-07684-x.	2021	Academic literature	ECLAIR Guidelines	Europe	Radiology	Evaluation - commercial AI solutions in radiology	Self-created	Theme-based	5 key domains: 1. Relevance 2. Performance and validation 3. Usability and integration 4. Regulatory and legal aspects 5. Financial and support services considerations	N/A	Top 10 questions to consider 1. What problem is the application intended to solve, and who is the application designed for? 2. What are the potential benefits and risks, and for whom? 3. Has the algorithm been rigorously and independently validated? 4. How can the application be integrated into your clinical workflow and is the solution interoperable with your existing software? 5. What are the I…	https://link.springer.com/article/10.1007/s00330-020-07684-x
Oniani D, Hilsman J, Peng Y, Poropatich RK, Pamplin JC, Legault GL, et al. Adopting and expanding ethical principles for generative artificial intelligence from military to healthcare. npj Digital Medicine. 2023;6(1):225. doi:https://dx.doi.org/10.1038/s41746-023-00965-x.	2023	Academic literature	GREAT PLEA	US	Healthcare - general; generative AI	Ethical principles - generative AI	Previous framework(s) - Used US Department of Defence ad NATO ethical guidelines as starting point and expanded them to meet the needs in healthcare (betterment of mankind over defeating adversaries); WHO guidelines.	Theme-based	9 principles: Governability Reliability Equity Accountability Traceability Privacy Lawfulness Empathy Autonomy	N/A		https://www.ncbi.nlm.nih.gov/pmc/articles/PMC10693640/
Raza MM, Venkatesh KP, Kvedar JC. Generative AI and large language models in health care: pathways to implementation. npj Digital Medicine. 2024;7(1):62. doi:10.1038/s41746-023-00988-4.	2024	Academic literature	Generative AI model evaluation checklist	US	Healthcare - general; generative AI	Evaluation - generative AI	Previous framework(s) - Derived from Wornow et al.'s evaluation framework	Theme-based	Five themes - Predictive performance and multimodality - Less labeled data - Simplified model deployment - Emergent clinical applications - Novel human-AI interface	N/A	Wornow et al's paper: https://www.nature.com/articles/s41746-023-00879-8	https://www.nature.com/articles/s41746-023-00988-4
Reddy S, Allan S, Coghlan S, Cooper P. A governance model for the application of AI in health care. Journal of the American Medical Informatics Association. 2020;27(3):491-7. doi:http://dx.doi.org/10.1093/jamia/ocz192.	2020	Academic literature	Governance Model for AI in Healthcare (GMAIH) Secondary framework: Integration of GMAIH into clinical workflow	Australia	Healthcare - general	Governance - ethical and regulatory concerns for AI governance Secondary framework - workflow integration	Review - Ethical, regulatory, and safety and quality concerns in the literature	Theme x stage	4 main components: - Fairness - Transparency - Trustworthiness - Accountability	3 stages at which M&E is critical: 1. Approval 2. Introduction 3. Deployment 6 key stages/steps to workflow integration: - Clinical workflow assessment - Workflow redesign - Changes to digital infrastructure including EHR - Clinical and executive leadership including clinical champions - Workforce training - Integration		https://academic.oup.com/jamia/article/27/3/491/5612169?login=true
Reddy S, Rogers W, Makinen V-P, Coiera E, Brown P, Wenzel M, et al. Evaluation framework to guide implementation of AI systems into healthcare settings. BMJ health & care informatics. 2021;28(1). doi:https://dx.doi.org/10.1136/bmjhci-2021-100444.	2021	Academic literature	Translational Evaluation of Healthcare AI (TEHAI)	Australia	Healthcare - general	Evaluation - evaluation of translational aspects and phases of AI systems. Assesses stages of development, deployment, integration, and adoption; evaluates the functional, utility, and ethical aspects - other frameworks focus on reporting and regulatory aspects)	Review, expert consensus - A critical review of literature assessed existing evaluation and reporting frameworks and gaps. Next, using health technology evaluation and translational principles, reporting components were identified for consideration. These were independently reviewed for consensus inclusion in a final framework by an international panel of eight experts.	Theme x stage	3 main components: - Capability - Objective, dataset source and integrity, internal validity, external validity, performance metrics, use case - Utility - Generalisability and contextualisation, safety and quality, transparency, privacy, non-maleficence - Adoption - Use in a healthcare setting, technical integration, number of services, alignment with domain	3 phases at which TEHAI checks are conducted: - Development check - Deployment check - Discernment check	Scoring method included	https://informatics.bmj.com/content/bmjhci/28/1/e100444.full.pdf
Reddy S. Generative AI in healthcare: an implementation science informed translational path on application, integration and governance. Implementation science : IS. 2024;19(1):27. doi:https://dx.doi.org/10.1186/s13012-024-01357-9.	2024	Academic literature	Generative AI - Translational Path	Australia	Healthcare - general; generative AI	Translation and integration - integration of generative AI into a clinical setting - workflow, technical, organisational integration	Previous framework(s) - Based on Technology Acceptance Model (TAM) and the Non-Adoption, Abandonment, Scale-up, Spread and Sustaibaility (NASSS) frameworks	Stage-based	N/A	4 'steps' for translation: 1. Acceptance and Adoption 2. Data and Resources 3. Technical Integration 4. Governance		https://implementationscience.biomedcentral.com/articles/10.1186/s13012-024-01357-9
Roski J, Maier EJ, Vigilante K, Kane EA, Matheny ME. Enhancing trust in AI through industry self-governance. Journal of the American Medical Informatics Association : JAMIA. 2021;28(7):1582-90. doi:https://dx.doi.org/10.1093/jamia/ocab065.	2021	Academic literature	NAM AI/ML Implementation Life Cycle Secondary framework: Steps to implement an accrediation/certification program	US	Healthcare - general	Implementation - AI life cycle Secondary framework: AI industry self-governed certification or accreditation program	Review - Recently published literature on AI risks and mitigation strategies - framework from the National Academy og Medicine (NAM) report on AI & Health - NAM AI/ML implementation life cycle Secondary framework - review of other certification and accrediation programs	Stage-based	Evidence-based practices: PHASE 1: Needs Assessment - User-centred design - Organizational readiness assessment - Organizational prioritization process - User-centered workflow/change management process PHASE 2: Development - Data transparency & reporting - Model provenance records - Promoting trust & explainability - Distributed model development PHASE 3: Implementation - Equitable/diverse workf…	4 phases: 1. Needs Assessment - identify or reassess needs; describe existing workflows 2. Development - define the desired target state; acquire or develop AI system 3. Implementation - implement AI system in target setting 4. Maintenance - monitor ongoing performance; maintain, update, or de-implement Secondary framework Steps: Incorporate perspectives from diverse stakeholder groups --> Develo…		https://academic.oup.com/jamia/article/28/7/1582/6250922
The Royal Australian and New Zealand College of Radiologists. Ethical Principles for AI in Medicine. 2023.	2023	Industry	Ethical Principles for AI in Medicine	Australia/NZ	Healthcare - general	Ethical principles - guide stakeholders involved in research or deployment of ML and AI including developers, health service executives and clinicians.	N/A	Theme-based	1. Principle One: Safety 2. Principle Two: Privacy and protection of Data 3. Principle Three: Minimisation of Bias 4. Principle Four: Transparency and Interpretability 5. Principle Five: Application of Human Values 6. Principle Six: Decision-Making on Diagnosis and Treatment 7. Principle Seven: Teamwork 8. Principle Eight: Responsibility for Decisions Made 9. Principle Nine: Governance	N/A		https://www.ranzcr.com/search/ethical-principles-for-ai-in-medicine
Saenz AD, McCoy T, Mantha AB, Martin R, Damiano R, Adair D, et al. Establishing responsible use of AI guidelines: a comprehensive case study for healthcare institutions. npj Digital Medicine. 2024;7(1):348. doi:10.1038/s41746-024-01300-8.	2024	Academic literature	Organizational Guidelines for AI Deployment at MGB	US	Healthcare - general	Guidelines - responsible use of AI in healthcare institutions	Expert consensus, review - After identifying initial themes with a comprehensive literature review, findings were discussed at a multidisciplinary Executive Leadership Summit. Members of the Executive Leadership identified Core Principles in expert subgroups, ultimately culminating in Official Guidelines.	Theme x stage	Presence of an AI Monitoring Committee I. Model Assessment - Data provenance for training and testing - Regulatory Compliance II. Pre-Deployment (Shadow Deployment) - Testing phase - Demographic Evaluation - System Customization - Model Output - Security and Privacy -Autonomy and Human Oversight - Transparency - Education III. Deployment and Continuous Monitoring - Documentation/Communication - P…	I. Model Assessment II. Pre-Deployment (Shadow Deployment) III. Deployment and Continuous Monitoring		https://www.nature.com/articles/s41746-024-01300-8
Salwei ME, Carayon P, Hoonakker PLT, Hundt AS, Wiegmann D, Pulia M, et al. Workflow integration analysis of a human factors-based clinical decision support in the emergency department. Applied Ergonomics. 2021;97:103498. doi:https://dx.doi.org/10.1016/j.apergo.2021.103498.	2021	Academic literature	Workflow Integration Checklist	US	Healthcare - ED	Translation and integration	Preiovus framework(s) - Builds on previous research on health IT usability, workflow, and the work system model.	Theme-based	4 dimensions of workflow integration: 1. Time (sequential, in parallel, discontinuous) 2. Flow of (tasks, people, information, tools) 3. Scope of patient journey (intra-visit, intra-org, inter-org) 4. Level (individual, team, organisation)	N/A		https://www.sciencedirect.com/science/article/pii/S0003687021001459
Segur-Ferrer J, Molto-Puigmarti C, Pastells-Peiro R, Vivanco-Hidalgo RM. Methodological Frameworks and Dimensions to Be Considered in Digital Health Technology Assessment: Scoping Review and Thematic Analysis. Journal of Medical Internet Research.26:e48694. doi:https://dx.doi.org/10.2196/48694.	2024	Academic literature	Proposed methodological framework for dHTA	Spain	Healthcare - general	Evaluation - dimensions to consider in digital health technology assessment (including AI)	Review - scoping review and thematic analysis	Theme-based	12 domains: 1. Description of health problem 2. Description of technology 3. Content 4.Safety 5. Clinical efficacy and effectiveness 6. Economic aspects 7. Human and sociocultural aspects 8. Ethical aspects 9. Legal and regulatory aspects 10. Organisational aspects 11. Technical aspects 12. Post-market monitoring	N/A		https://www.jmir.org/2024/1/e48694
Sendak MP, D'Arcy J, Kashyap S, Gao M, Nichols M, Corey KM, et al. A Path for Translation of Machine Learning Products into Healthcare Delivery. EMJ Innovations. 2020. doi:10.33590/emjinnov/19-00172.	2020	Academic literature	A path for the design, development, evaluation, validation, diffusion, and scaling of machine learning models to be used in clinical care	US	Healthcare - general	Translation and integration	Case studies - Analysis of 21 case studies of ML models applied to clinical decision support tasks (14 primarily inpatient, 7 outpatient)	Theme x stage	1. - Settings and funding - Data types and sources - Typical team progression - Productise existing model 2a. In silico - Clinical utility - Staistical validity - Economic utility 2b. Internal/temporal 2c. Care integration - Clinical integration - Tehcnical integration - Operational integration 2d. External 3. - Deployment modalities - Funding (product) - Drivers of adoption	1. Design and develop 2. Evaluate and validate 3. Diffuse and scale 4. Continuing monitoring and maintenance		https://pdfs.semanticscholar.org/5901/1ad325af99afc0fe6b6812f47787ed89889e.pdf
Siala H, Wang Y. SHIFTing artificial intelligence to be responsible in healthcare: A systematic review. Social Science & Medicine. 2022;296:114782. doi:https://doi.org/10.1016/j.socscimed.2022.114782.	2022	Academic literature	The SHIFT framework	UK	Healthcare - general; responsible AI inititatives	Implementation	Review - Systematic review	Theme-based	5 themes with subthemes: Sustainable AI - Responsible local leadership - Social sustainability Human-centric AI - Embedding humanness in AI to meet ethics of care - The role of health professionals in maintaining public trust - Developing artificial wisdom through interdisciplinary collaboration Inclusive AI - Inclusive communication and invovlement in AI governance Fair AI - Alleviating algorith…	N/A		https://www.sciencedirect.com/science/article/pii/S0277953622000855?ref=pdf_download&fr=RR-2&rr=91ae4ab63dc0a80d
Singapore Ministry of Health. Artificial Intelligence in Healthcare Guidelines. 2021.	2021	Government document	The Artificial Intelligence in Healthcare Guidelines (AIHGle)	Singapore	Healthcare - general; AI medical devices	Guidelines - with the increasing use of healthcare AI in Singapore, the intent of the AIHGle is to improve clinical and public trust in the technology by: a. Providing a set of recommendations to encourage the safe development and implementation of primarily AI-Medical Devices (“AI-MDs”), and secondarily any other AI implemented in healthcare settings; and b. Signposting HSA's AI-MD registration …	N/A	Theme x stage	Guiding principles: Fairness, Responsibility, Transparency, Explainability, Patient-Centricity Guideline sections: Development - Design: clinical inputs, end-user inputs, understanding the current clinical practice, data, cybersecurity, explainability - Build: development standards, self-validation - Test: Evaluation and monitoring of AI-MD, intended use and workflow Implementation - Use: Clinica…	Development - design, build, test Implementation - use, monitor & respond, review		https://isomer-user-content.by.gov.sg/3/9c0db09d-104c-48af-87c9-17e01695c67c/1-0-artificial-in-healthcare-guidelines-(aihgle)_publishedoct21.pdf
Smith TG, Norasi H, Herbst KM, Kendrick ML, Curry TB, Grantcharov TP, et al. Creating a Practical Transformational Change Management Model for Novel Artificial Intelligence-Enabled Technology Implementation in the Operating Room. Mayo Clinic Proceedings: Innovations, Quality and Outcomes. 2022;6(6):584-96. doi:https://dx.doi.org/10.1016/j.mayocpiqo.2022.09.004.	2022	Academic literature	Health Care Novel Technology Change Management (CM) Strategies Checklist	Canada	Healthcare - novel technologies in operating rooms	Translation and integration - change management	Review - Literature review	Theme-based	6 strategies: 1. Assemble project team with necessary expertise 2. Anticipate potential institutional cultural and regulatory hurdles 3. Add agility to project planning and execution 4. Accommodate institutional culture and regulations 5. Early clinical partner buy-in and stakeholder engagement 6. Consistent Communication	N/A		https://www.sciencedirect.com/science/article/pii/S2542454822000625
Solanki P, Grundy J, Hussain W. Operationalising ethics in artificial intelligence for healthcare: A framework for AI developers. AI and Ethics. 2023;3(1):223-40. doi:https://doi.org/10.1007/s43681-022-00195-z.	2022	Academic literature	Ethical AI Framework	Australia	Healthcare - general	Ethical principles - developers	Review - Framework is built from a scoping review of existing solutions of ethical AI guidelines, frameworks and technical solutions. Human values from Schwartz' Theory of Basic Human Values; ethical principles from a scoping review of AI ethics guidelines.	Stage-based	4 human values (and corresponding ethical principles): - Security (Non-maleficence) - Self-direction (Freedom and autonomy, Dignity, Privacy) - Benevolence (Beneficence, Responsibility, Trust, Transparency, Solidarity) - Universalism (Justice and fairness, Sustainability) Main framework also includes governance (orgnaisational policy) and regulation (legal policy)	3 stages: 1. Data management (data collection, protection, cleaning, reporting) 2. Model development (model training, verification, reporting) 3. Deployment and monitoring (stakeholder engagement, updates and ongoing validation, supervision and auditing)		https://link.springer.com/article/10.1007/s43681-022-00195-z#
Solomonides AE, Koski E, Atabaki SM, Weinberg S, McGreevey JD, Kannry JL, et al. Defining AMIA's artificial intelligence principles. Journal of the American Medical Informatics Association : JAMIA. 2022;29(4):585-91. doi:https://dx.doi.org/10.1093/jamia/ocac006.	2022	Academic literature	AMIA Principles Governing AI	US	Healthcare - general; describes the Americal Medical Informatics Association's stand on the use of AI in healthcare	Ethical principles	Previous framework(s) - Some principles are derived from the four Belmont principles in medicine and healthcare. A set of principles follow from the creation and engineering of AI systems.	Theme x stage	AI system/technical principles: - Autonomy - Beneficence - Nonmaleficence - Justice - Explainability - Interpretability - Fairness - Dependability - Auditability - Knowledge Management Organisations: - Benevolence - Transparency - Accountability Special Considerations: - Vulnerable populations - AI research - User education	5 stages: 1. Inception 2. Development 3. Deployment 4. Maintenance 5. Decommissioning		https://academic.oup.com/jamia/article/29/4/585/6534106
Stogiannos N, Malik R, Kumar A, Barnes A, Pogose M, Harvey H, et al. Black box no more: a scoping review of AI governance frameworks to guide procurement and adoption of AI in medical imaging and radiotherapy in the UK. Br J Radiol. 2023;96(1152):20221157. doi:10.1259/bjr.20221157.	2023	Academic literature	Conceptual AI governance framework	UK	Medical imaging and radiotherapy in the UK	Governance	Review - scoping review	Theme-based	7 pillars of AI governance: - Validation and evaluation - Regulation, legislation, and ethics - AI auditing and quality assurance - AI research and innovation - Training of staff - Public, patient, practitioner involvement - Leadership and staff management	N/A		https://www.ncbi.nlm.nih.gov/pmc/articles/PMC10646619/
Taribagil P, Hogg HDJ, Balaskas K, Keane PA. Integrating artificial intelligence into an ophthalmologist’s workflow: obstacles and opportunities. Expert Review of Ophthalmology. 2023;18(1):45-56. doi:10.1080/17469899.2023.2175672.	2023	Academic literature	N/A	UK	Opthamology	Translation and integration	Review of literature	Stage-based	Challenges: Clinical challenges - Clinical valdiation - Need for explainability & interpretability - Human-computer interaction and issues of clinical adoption Technical challenges - Integration with electronic health records - The need for interoperability with use of DICOM standards - Surveillance and monitoring Oeprational challenges - Ethical issues for widespread implementation of AI - Medic…	Four steps in translational pathway: 1. Design & development 2. Evaluation & validation 3. Integration & deployment 4. Continued monitoring & iterations		https://www.tandfonline.com/doi/full/10.1080/17469899.2023.2175672
Truong T, Gilbank P, Johnson-Cover K, Ieraci A. A Framework for Applied AI in Healthcare. Studies in health technology and informatics. 2019;264(ck1, 9214582):1993-4. doi:https://dx.doi.org/10.3233/SHTI190751.	2019	Academic literature	Framework for Applied AI in Healthcare	Canada	Healthcare - general	Implementation	Review, consultation - Environmental scan via informal meetings with eight subject matter experts + literature review	Theme-based	9 key themes identified: - Data (core) - Trust, Ethics (second level) - Readiness, Expertise, Buy-in (third level) - Regulatory Strategy, Scalability, Evaluation (fourth level)	N/A		https://ebooks.iospress.nl/publication/52516
UK Government Department of Health and Social Care. A guide to good practice for digital and data-driven health technologies. 2021.	2021	Government document	A guide to good practice for digital and data-driven health technologie	UK	Healthcare - general	Guidelines - this guide is designed to support innovators in understanding what the NHS is looking for when it buys digital and data-driven technology for use in health and care, so that these principles of good practice can be built into the strategy and product development ‘by design’.	Previous framework(s), consultation - This guide is an update to the ‘Code of Conduct for Data-Driven Health and Care Technologies’. We hear from innovators that they valued the practical advice within the Code and this has been strengthened and expanded upon in this update.	Theme-based	1. How to operate ethically 2. Have a clear value proposition 3. Usability and accessibility 4. Technical assurance 5. Clinical safety 6. Data protection 7. Data transparency 8. Cybersecurity 9. Regulation 10. Interoperability and open standards 11. Generate evidence that the product achieves clinical, social, economic or behavioural benefits 12. Define the commercial strategy	N/A		https://www.gov.uk/government/publications/code-of-conduct-for-data-driven-health-and-care-technology/initial-code-of-conduct-for-data-driven-health-and-care-technology
UK Government National Institute for Health and Care Excellence (NICE). Evidence standards framework (ESF) for digital health technologies. 2022	2022	Government document	ESF	UK	Healthcare - general	Reporting - the NICE evidence standards framework (ESF) for digital health technologies (DHTs) describes standards for the evidence that should be available or developed for DHTs to demonstrate their value in the UK health and social care system.	Review, interviews, expert consensus - The Academic collaboration conducted a three-stage research programme: 1. a scoping literature review 2. a survey and interviews 3. a Delphi Consensus Process. In 2022, framework was updated to include AI following an open consultation	Stage-based	N/A	21 standards arranged in 5 groups: - Design factors - Describing value - Demonstrating performance - Delivering value - Deployment considerations		https://www.nice.org.uk/about/what-we-do/our-programmes/evidence-standards-framework-for-digital-health-technologies
UK National Health Services. A Buyer's Guide to AI in Health and Care. 2020.	2020	Government document	A buyer's guide to AI in health and care	UK	Healthcare - general	Evaluation - buying - this guide sets out important questions you need to consider to make well-informed decisions about buying AI products.	N/A	Theme x stage	10 questions under 4 categories: Problem identification 1. Problem to be solved? Product Assessment 2. Regulatory standards? 3. Valid performance claims? Implementation considerations 4. Work in practice? 5. Support from staff & service users? 6. Culture of ethics? 7. Data protection and privacy? 8. Ongoing maintenance? Procurement and delivery 9. Compliant procurement? 10. Robust contractual out…	4 cateogries/stages: 1. Problem identification 2. Product assessment 3. Implementation considerations 4. Procurement and delivery	Assessment template: https://transform.england.nhs.uk/ai-lab/explore-all-resources/adopt-ai/a-buyers-guide-to-ai-in-health-and-care/ai-buyers-guide-assessment-template/	https://transform.england.nhs.uk/ai-lab/explore-all-resources/adopt-ai/a-buyers-guide-to-ai-in-health-and-care/
UK National Health Services. Digital Technology Assessment Criteria (DTAC). 2021.	2021	Government document	DTAC	UK	Healthcare - general	Evaluation - buyers and developers	N/A	Theme-based	A. Company information (non-assessed) B. Value proposition (non-assessed) C. Technical questions C1. Clinical safety C2. Data protection C3. Technical security C4. Interoperability criteria D. Key principles for success D1. Usability and accessibility	N/A		https://transform.england.nhs.uk/key-tools-and-info/digital-technology-assessment-criteria-dtac/
US Department of Health and Human Services. Trustworthy AI Playbook. 2021.	2021	Government document	Trustworthy AI playbook	US	Healthcare - general	Guidelines - The TAI Playbook is designed to support leaders across the Department in applying TAI principles. It outlines the core components of TAI and helps identify actions to take for different types of AI solutions	Self-created - OCAIO (Office of the Chief AI Officer) created the Trustworthy AI (TAI) Playbook to help Divisions meet this requirement. The Playbook consolidates the EO principles into six TAI principles and reflects the latest Department perspective on TAI adoption.	Theme x stage	Principles for use of trustworthy AI in government: - Fair/impartial - Transparent/explainable - Responsible/accountable - Safe/secure - Privacy - Robust/reliable Internal AI deployment considerations: - AI lifecycle overview (see key stages) Exetrnal AI considerations: - Regulatory - Non-regulatory	4 phases of a typical AI lifecycle: 1. Initation & concept 2. Research and design 3. Develop, train, & deploy 4. Operate & maintain		https://www.hhs.gov/sites/default/files/hhs-trustworthy-ai-playbook-executive-summary.pdf
Van de Sande D, Van Genderen ME, Smit JM, Huiskens J, Visser JJ, Veen RER, et al. Developing, implementing and governing artificial intelligence in medicine: a step-by-step approach to prevent an artificial intelligence winter. BMJ health & care informatics. 2022;29(1). doi:10.1136/bmjhci-2021-100495.	2022	Academic literature	Steps and elements required to structurally develop and implement AI in medicine	The Netherlands	Healthcare - general	Governance - across the life cycle (development, implementation, and governance)	Review - Literature review to identify key documents; regulatory documents	Stage-based	N/A	5 phase model: Phase 0 - Preparations prior to AI model development Phase I - AI model development Phase II - Assessment of AI performance and reliability Phase III - Clinical testing AI Phase IV: Implementing and governing AI	Also has stakeholder engagement dimension indicating stakeholder groups that need to be engaged at each stage	https://www.ncbi.nlm.nih.gov/pmc/articles/PMC8860016/
van der Vegt AH, Scott IA, Dermawan K, Schnetler RJ, Kalke VR, Lane PJ. Implementation frameworks for end-to-end clinical AI: derivation of the SALIENT framework. Journal of the American Medical Informatics Association : JAMIA. 2023;30(9):1503-15. doi:https://dx.doi.org/10.1093/jamia/ocad088.	2023	Academic literature	SALIENT framework	Australia	Healthcare - general; clinical AI implementation	Implementation - all elements/stages	Review, previous framework(s) - Provisional framework derived by integrating TRIPOD, DECIDE-AI, CONSORT-AI reporting standards. Final framework refined based on a scoping review of clinical AI implementation studies.	Theme x stage Pragmatic staged approach (elements x stage); components and tasks under each element	7 elements (across 5 stages): A. Specification B. Component development C. Combination of components into systems D. Integration of system into environment E. Routine use F. Organisation engagement G. Policy domains	5 key stages: Stage I - Definition Stage II - Retrospective study Stage III - Silent trial Stage IV - Pilot trial Stage V - Large trial/roll-out		https://doi.org/10.1093/jamia/ocad088	https://doi.org/10.1093/jamia/ocad075
Vasey B, Nagendran M, Campbell B, Clifton DA, Collins GS, Denaxas S, et al. Reporting guideline for the early stage clinical evaluation of decision support systems driven by artificial intelligence: DECIDE-AI. BMJ. 2022;377:e070904. doi:10.1136/bmj-2022-070904.	2022	Academic literature	DECIDE-AI	UK	Health research - early stage clinical evaluation studies	Reporting - reporting guidelines for early live clinical AI evaluations	Expert consensus Two round, modified Delphi process (n=123; 138) to collect and analyse expert opinion on the reporting of early clinical evaluation of AI systems. The final composition and wording of the guideline was determined at a virtual consensus meeting (n=16). The checklist and the Explanation & Elaboration (E&E) sections were refined based on feedback from a qualitative evaluation proces…	Based on structure of a report	Title Abstract Introduction Intended use, Objectives Methods Research governance, Participants, Al system, Implementation, Outcomes, Safety and errors, Human factors, Analysis, Ethics, Patient involvement Results Participants, Implementation, Main results, Subgroups analysis, Modifications, Human-computer agreement, Safety and errors, Human factors Discussion Support for intended use, Safety and …	N/A		https://www.bmj.com/content/377/bmj-2022-070904
Vollmer S, Mateen BA, Bohner G, Király FJ, Ghani R, Jonsson P, et al. Machine learning and artificial intelligence research for patient benefit: 20 critical questions on transparency, replicability, ethics, and effectiveness. Bmj. 2020;368:l6927. doi:10.1136/bmj.l6927.	2020	Academic literature	Critical questions for health related technology involving machine learning and artificial intelligence	UK	Health research - ML and AI	Evaluation - framework for research groups to inform the design, conduct, and reporting; for editors and peer reviewers to evaluate contributions to the literature; and for patients, clinicians and policy makers to critically appraise where new findings may deliver patient benefit.	Workshop/focus group - Questions arose from a dialogue between a group of UK-based and international organisations spanning a range of different perspectives, from statutory regulators and national advisory bodies, to academic organisations, e.g. Alan Turing Institute	Stage-based	Based on the 4 TREE concerns: - Transparency - Replicability - Ethics - Effectiveness	6 stages: 1. Inception 2. Study 3. Statistical methods 4. Reproducibility 5. Impact evaluation 6. Implementation		https://www.bmj.com/content/368/bmj.l6927
Whittaker R, Dobson R, Jin CK, Style R, Jayathissa P, Hiini K, et al. An example of governance for AI in health services from Aotearoa New Zealand. NPJ Digital Medicine. 2023;6(1):164. doi:10.1038/s41746-023-00882-z.	2023	Academic literature	AI Governance Checklist Questions at Points in the AI Lifecycle Secondary framework: Te Mana o te Raraunga Framework	New Zealand	Healthcare - general; services in NZ	Governance - all stages of the AI life cycle. Centred on 'appropriateness' and specificity to NZ context (strong component on Māori perspectives/voice). Secondary framework - Ethical principles; AI development and evaluation - focus on cultural safety/appropriateness	Review, previous framework(s) - International and national principles, guidelines, reviews (e.g., WHO Ethics and Governance of AI for Health, Te Ara Tika Guidelines for Māori Research Ethics, etc.) Secondary framework - Developed internally; based on a previous framework for big data (Hudson et al. 2017) but adapted to AI	Theme x stage	9 domains: - Appropriateness - Consumers/population perspectives - Māori perspectives - Equity and fairness - Ethical principles - Clinical perspectives - Data availability, quality, appropriateness, and completeness - Technical processes - Contractual and legal issues Secondary framework - Two interwoven spirals: - Level of accessibility (Noa) - Level of sensitivity (Tapu) Contains the following…	Checklist for each domain across 3 stages: - Concept development - Access to data for pre-processing, labelling, or model development - Validation or implementation of an existing AI model	This paper also includes two other diagrams/frameworks which could be useful for governance: the 'Domains for Consideration' (Fig 1; conceptual framework re domains to consider for AI governance which were adapted into the final framework) and 'The AI Development Lifecycle: The AI development workflow consisting of four key roles' (Fig 3; outlines key tasks at each stage of the AI development wor…	https://www.nature.com/articles/s41746-023-00882-z
Wiens J, Saria S, Sendak M, Ghassemi M, Liu VX, Doshi-Velez F, et al. Do no harm: a roadmap for responsible machine learning for health care. Nature medicine. 2019;25(9):1337-40. doi:10.1038/s41591-019-0548-6.	2019	Academic literature	A roadmap for deploying effective ML systems in health care	US	Healthcare - general	Translation and integration (ML products)	Self-created	Stage-based	N/A	7 stages: 1. Choosing the right problems 2. Developing a useful solution 3. Considering the ethical implications 4. Rigorously evaluating the model 5. Thoughtfully reporting results 6. Deploying responsibly 7. Making it to market		https://www.nature.com/articles/s41591-019-0548-6
World Health Organization. Ethics and governance of artificial intelligence for health: WHO guidance. Geneva: World Health Organization; 2021. Available from: https://www.who.int/publications/i/item/9789240029200.	2021	Government document	Ethics and governance of artificial intelligence for health: WHO guidance	Intergovernmental	Healthcare - general	Governance	Self-created	Theme-based	Ethical principles: - Protect autonomy - Promote human well-being, human safety, and the public interest - Ensure transparency, explainability and intelligibility - Foster responsibility and accountability - Ensure inclusiveness and equity - Promote artificial intelligence that is responsive and sustainable	N/A		https://www.who.int/publications/i/item/9789240029200
World Health Organization. Generating evidence for artificial intelligence-based medical devices: a framework for training, validation and evaluation. Geneva: World Health Organization; 2021.	2021	Government document	Generating evidence for artificial intelligence-based medical devices: a framework for training, validation and evaluation	Intergovernmental	Healthcare - general; AI based medical devices	Evaluation - globally recognised benchmarking framework to assess evidence generated by the use of AI-SaMD	Review, consultation - The framework draws together all current standards and frameworks, and references the wide range of academic, regulatory and policy organisations doing work in this area.	Theme x stage	Secton I - Intended Use - Model development and training for clinical evaluation - Dataset management - Internal validation and data management Section II - External validation - Data management - Evidence generation standards - Evidence reporting Section III - Evaluation of usability - Evaluation of clinical impact - Evidence on implementation - Evidence on procurement	Report is divided into three sections: SECTION I. SOFTWARE DEVELOPMENT SECTION II. SOFTWARE VALIDATION AND REPORTING SECTION III. DEPLOYMENT AND POST-MARKET SURVEILLANCE		https://www.who.int/publications/i/item/9789240038462
World Health Organization. Ethics and governance of artificial intelligence for health: Guidance on large multi-modal models. Geneva: World Health Organization; 2024. Available from: https://www.who.int/publications/i/item/9789240084759.	2024	Government document	Ethics and governance of artificial intelligence for health: Guidance on large multi-modal models	Intergovernmental	Healthcare - general	Governance	N/A	Theme x stage	At each stage of the AI value chain, the following questions are asked. 1. Which actor (the developer, the provider and/or the deployer) is best placed to address relevant risks? What risks should be addressed in the AI value chain? 2. How can the relevant actor(s) address such risks? What ethical principles must they uphold? 3. What is the role of a government in addressing risks? What laws, pol…	Three critical stages of the AI value chain covered: - Design and development phase - Provision phase - Deployment phase		https://www.who.int/publications/i/item/9789240084759
Yan AP, Guo LL, Inoue J, Arciniegas SE, Vettese E, Wolochacz A, et al. A roadmap to implementing machine learning in healthcare: from concept to practice. Frontiers in Digital Health. 2025;7. doi:10.3389/fdgth.2025.1462751.	2025	Academic literature	N/A	Canada	Healthcare - general	Implementation	Case study - examples of addressing common challenges of deployment from experience implementing PREDICT	Stage-based	N/A	1. Identify clinical scenarios 2. Establish data infrastructure and utilisation 3. Create MLOps 4. Integrate into clinical workflows		https://www.frontiersin.org/journals/digital-health/articles/10.3389/fdgth.2025.1462751/full
