# Supplementary material for: Governance for safe and responsible AI in healthcare organisations: A scoping review of frameworks
Source: Research Square preprint supplement (doi:10.21203/rs.3.rs-7209096/v1), 2025-08-19
Supplement: Supplementary file 4 [file bc995cc5b5ddee68f4a41ac9.xlsx]

## Sheet: Key components
Frameworks	Principles	Assessment method	AI life cycle stages, timeline	Oversight mechanism (not including self-assessment)	Number of components
Abujaber (2024)	x				1
ACD (2022)	x				1
AMA (2023)	x	x			2
Apfelbacher et al. (2024)	x	x	x	x	4
Bellini et al. (2023)		x			1
Bertl et al. (2023)	x				1
Brady et al. (2024)	x	x			2
Callahan et al. (2024)	x	x	x	x	4
Cartolovni et al. (2022)	x				1
Cawthorne & Robbins-van Wynsberghe (2020)	x				1
Chae (2024)			x		1
Char et al. (2020)	x	x	x		3
CHAI (2024)	x	x	x	x	4
Cresswell et al. (2020)	x	x			2
Ding et al. (2024)	x	x	x		3
Dixit et al. (2021)	x	x		x	3
Economou-Zavlanos et al. (2024)	x	x	x	x	4
Hassan et al. (2024)	x		x		2
Hernandez-Boussard et al. (2020)	x	x			2
Jacob et al. (2025)	x	x			2
Katirai (2023)	x				1
Kawamoto et al. (2023)		x			1
Khanna et al. (2021)	x				1
Kim et al. (2023)	x		x		2
Kim et al. (2024)	x	x	x		3
Kim et al. (2024)	x	x	x		3
Kwong (2024)	x	x			2
Lehoux et al. (2023)	x	x			2
Lekadir et al. (2023)	x	x	x		3
Liao et al. (2022)	x	x	x	x	4
Liu et al. (2020)	x	x			2
Marconi et al. (2025)	x	x			2
McCradden et al. (2022)	x	x	x		3
McCradden et al. (2023)	x	x			2
Mirbabaie et al. (2022)	x				1
Morley et al. (2021)	x	x	x	x	4
Nasir et al. (2024)	x			x	2
Nebeker et al (2019)	x	x			2
Ning et al. (2024)	x				1
Novak et al. (2023)	x	x			2
Nwosu et al. (2023)	x				1
NZ Ministry of Health Manatu Hauora (2019)	x	x		x	3
Omoumi et al. (2021)	x	x			2
Oniani et al. (2023)	x				1
Raza (2024)	x	x			2
Reddy et al. (2019)	x		x	x	3
Reddy et al. (2021)	x	x	x		3
Reddy (2024)	x			x	2
Roski et al. (2021)	x		x		2
RANZCR (2023)	x				1
Saenz (2024)	x	x	x	x	4
Salwei et al. (2021)	x	x			2
Segur-Ferrer (2024)	x				1
Sendak et al. (2020)	x	x	x		3
Siala & Wang (2022)	x	x			2
Singapore MOH, HSA, and IHiS (2021)	x	x	x	x	4
Smith et al. (2022)	x	x			2
Solanki et al. (2022)	x	x	x		3
Solomonides et al. (2022)	x		x		2
Stogiannos et al. (2023)	x				1
Taribagil et al. (2023)	x		x		2
Truong et al. (2019)	x				1
UK Government Department of Health & Social Care (2021)	x	x			2
UK Government National Institute for Health and Care Excellence (2022)		x	x		2
UK NHS (2020)	x	x	x		3
UK NHS (2021)	x	x			2
US Department HHS (2021)	x	x	x		3
van de Sande et al. (2022)	x		x		2
van der Vegt et al. (2023)	x	x	x	x	4
Vasey et al (2022)	x	x			2
Vollmer et al. (2020)	x	x	x		3
Whittaker et al. (2023)	x	x	x	x	4
Wiens et al (2019)	x		x		2
WHO (2021)	x	x			2
WHO (2021)	x	x	x		3
WHO (2024)	x	x	x		3
Yan (2025)			x		1
